# Supplementary material for: m-Terphenyl thiols: rigid and bulky molecules for the formation of bioactive self-assembled monolayers on gold
Source: Royal Society of Chemistry journal article supplement (doi:10.1039/b410264a), 2004-01-01
Supplement: b410264a.doc [file b410264a.doc]

# Supporting Information

# *m*-Terphenyl thiols: rigid and *bulky* molecules for the formation of bioactive self-assembled monolayers on gold

Diane A. Dickie,*a* Andy Y. C. Chan,*a* Hanifa Jalali,*a* Hilary A. Jenkins,*b* Hua-Zhong Yu**a* and Jason A. C. Clyburne**a*

a Department of Chemistry, Simon Fraser University, Burnaby, British Columbia, V5A 1S6,Canada. Fax: 1‑604-291-3765; E-mail: clyburne@sfu.ca, hzyu@sfu.ca

b Department of Chemistry, Saint Mary’s University, Halifax Nova Scotia, B3H 3C3, Canada.

**General:** NMR spectra were recorded on a Varian AS 500 MHz spectrometer in 5 mm quartz tubes. 1H and 13C{1H} chemical shifts are reported in parts per million (ppm) downfield from tetramethylsilane (TMS) and are calibrated to the residual signal of the solvent. Infrared spectra of **1-3** were obtained using a Bomem MB spectrometer with the % transmittance values reported in cm‑1. The external reflection FTIR spectra of the surfaces were obtained using a Thermo Nicolet NEXUS 470 Fourier-Transform infrared spectrometer equipped with external reflection IR apparatus. Melting points were measured using a Mel-Temp apparatus and are uncorrected. High-resolution mass spectra were obtained on a Kratos Concept IH mass spectrometer with EI ionization and referenced to perfluorokerosene. Contact angle measurements were obtained using a VCA OPTIMA System and the software provided by the manufacture. The exact pH of each buffer was determined using an OAKTON WD-35617-series benchtop meter. Ethanol (99.9%) was purchased from Commercial Alcohols Inc. and acetic acid (99.7%) was purchased from EM Science. The deionised water (DDW) was obtained using a Barnstead EASYpure UV/UF water purification system. The gold-coated glass slides (100 nm Au on top of 10 nm Cr) were purchased from Evaporated Metal Films (EMF) Inc. All other reagents were purchased from Aldrich and used as received.

**Synthesis of 4-methyl-2,6-diphenylbenzoic acid (1)[[1]](#endnote-2)**: Phenylmagnesium bromide (160 mL, 1.0M in THF) was added dropwise to a solution of 2,6-dibromo-4-methyliodobenzene (20.0 g, 53.2 mmol) in 40 ml and stirred for 2.5 hours. Dry CO2 was bubbled through the reaction mixture for 3.5 hours and the reaction was then quenched with 100 mL H2O and 20 mL 1M HCl followed by extraction with ether. The organic layer was washed with H2O and dried with MgSO4. Solvent was removed under vacuum to give a white powder that was recrystallised from ether. Yield = 7.88 g (51%), m.p. = 240-242°C. 1H NMR (CDCl3, 500 MHz)  7.35-7.43 (m, 10H), 7.19 (s, 2H), 2.45 (s, 3H). 13C{1H} NMR (CDCl3, 125 MHz)  173.4, 140.7, 140.6, 139.9, 130.4, 129.9, 129.1, 128.9, 128.6, 128.5, 127.7, 21.5. IR (nujol, cm-1)  1683 (s), 1598 (m), 1495 (m), 1299 (s), 1189 (w), 1115 (w), 951 (w), 871 (w), 784 (w), 773 (m), 699 (s). HR‑MS (*m/z*): [M+] calculated for C20H16O2, 288.1150; found, 288.1145.

**Synthesis of 4-bromomethyl-2,6-diphenylbenzoic acid (2)[[2]](#endnote-3)**: 4-Methyl-2,6-diphenylbenzoic acid (2.00 g, 6.94 mmol) and *N*-bromosuccinimide (1.36 g, 7.36 mmol) were suspended in 30 mL benzene. Benzoyl peroxide (0.17 g, 0.69 mmol) was added and the mixture was heated to reflux under nitrogen for 3.5 hours. An additional portion of NBS (0.33 g, 1.85 mmol) was added and the reflux was continued for another 3 hours. The reaction mixture was cooled to room temperature and the solvent was removed under vacuum. The residue was suspended in 20 mL hot H2O and filtered to give a white powder. Yield = 0.78 g (31%), m.p. = 214-216°C. 1H NMR (CDCl3, 500 MHz)  7.36-7.41 (m, 10H), 7.19 (s, 2H), 4.53 (s, 2H). 13C{1H} NMR (CDCl3, 125 MHz)  173.0, 141.2, 140.7, 139.8, 139.5, 131.7, 129.7, 128.7, 128.6, 128.5, 128.1, 32.4. IR (nujol, cm-1)  1698 (s), 1599 (w), 1494 (w), 1289 (m), 1277 (m), 1213 (w), 1146 (w), 1116 (m), 1075 (w), 1029 (w), 786 (m), 701 (s). HR‑MS (*m/z*): [M+] calculated for C20H15BrO2, 366.0255; found, 366.0250.

**Synthesis of 4-mercaptomethyl-2,6-diphenylbenzoic acid** (**3)[[3]](#endnote-4)**: 4-Bromomethyl-2,6-diphenylbenzoic acid (0.75 g, 2.04 mmol) and thiourea (0.17 g, 2.25 mmol) were suspended in 15 mL ethanol. The mixture was heated to reflux under nitrogen for 2.5 hours. The solution was cooled to room temperature and a solution of sodium bicarbonate (0.45 g in 4.5 mL H2O) was added dropwise to the reaction mixture. The mixture was again heated to reflux under nitrogen for 3 hours, then cooled to room temperature and filtered. The solution was acidified with H2SO4 and then placed in the freezer overnight. A pale yellow precipitate was isolated by filtration. Yield = 0.56 g (86%), m.p. = 250°C (dec). 1H NMR (DMSO, 500 MHz)  7.35-7.44 (m, 10H), 7.18 (s, 2H), 3.81 (d, 3JH-H = 8.1 Hz, 2H), 3.09 (t, 3JH-H = 8.1 Hz, 1H). IR (nujol, cm-1)  1673 (s), 1598 (m), 1576 (w), 1495 (w), 1295 (m), 1273 (m), 1180 (w), 1117 (w), 1089 (w), 1075 (w), 1045 (w), 1028 (w), 784 (w), 772 (w), 759 (w), 701 (s). HR‑MS (*m/z*): [M+] calculated for C20H16O2S, 320.0871; found, 320.0871.

**SAM preparation:** A gold-coated glass slide was cut into rectangular pieces approximately 3 × 2.4 cm2 and rinsed with DDW. The substrate was then cleaned by immersion in Piranha solution (1:3 H2O2:H2SO4) for 1 min. After cleaning, it was washed with DDW and dried under a stream of dry nitrogen. The clean, dry gold substrate was immersed for at least 24 hours into a degassed solution of **3** (4.0 mg) and acetic acid (4.0 mL) in 40 mL ethanol. Upon removal from the solution, the substrate was rinsed with the acetic acid/ethanol solvent mixture and then DDW.

**Reaction of SAM with adenine:** Adenine (14.4 mg) was dissolved with sonication in 40 ml of THF. The solution was filtered and the sample plate was immersed in the filtrate for approximately 1 hour.

**FTIR spectroscopy of the SAMs:** Approximately 20 min. prior to taking IR measurements, the FTIR spectrometer was cooled by liquid nitrogen, the external reflection FTIR apparatus (set at 80º) was installed and the polariser was set to 0° (p-polarisation). The number of scans was set at 2000 and the resolution was set to 2.0 cm‑1. A blank gold slide that had been cleaned by the procedure described above was placed on the external reflection FTIR apparatus of the spectrometer. The sample chamber was purged with dry air in order to reduce the water signal from the atmospheric moisture. After the initial drying time (approximately 2 hours), a spectrum was taken every hour for 15 hours. Identical procedures were followed for the SAMs of **3** and the SAMs of **3** after reactionwith adenine. The final spectra were obtained by subtracting the most closely matched (based on the intensity of the residual water signal) blank and sample spectra.

**Contact angle measurements:** Buffers from pH 2 to pH 12 were prepared to a total ionic strength of 0.01 M. Buffer solutions with pH from 2 to 3 were prepared from phosphoric acid and sodium phosphate monobasic; pH 4 to 5 were prepared from acetic acid and sodium acetate; pH 6 to 8 were prepared from sodium phosphate monobasic and sodium phosphate dibasic; pH 9 to 11 were prepared from sodium phosphate bicarbonate and sodium carbonate; and finally, pH 12, was prepared from sodium phosphate dibasic and sodium phosphate tribasic. The non-reactive measuring procedure was employed for all contact angle titrations. Immediately prior to measuring the contact angle, the gold surface modified with SAMs of 3 was immersed in the buffer that was to be used as the measuring droplet. Four sets of contact angles were obtained from four different droplets for each buffer. The contact angle reported for each buffer is the average of these measurements. Droplets of 1.0 L were deposited on the contact angle apparatus by with an Anachemia Automatic Pipette. All measurements were conducted at room temperature and ambient conditions. The contact angles were plotted against the pH to obtain the titration curve.

**X-ray Crystallography**: A single crystal of 4-methyl-2,6-diphenylbenzoic acid **1** was mounted on a glass fibre and centred on a Seimens 1K SMART/CCD diffractometer. Data were collected at ‑50 ºC using Mo(K) radiation. Lorentz and polarisation corrections were applied and data were also corrected for absorption using redundant data and the SADABS program. Direct methods and Fourier techniques were used to solve the crystal structures. Refinement was conducted using full-matrix least-squares calculations and SHELX-TL PC V 5.03. All non-hydrogen atoms were refined with anisotropic displacement parameters.

Table 1. Crystal data and structure refinement for **1**.

Empirical formula C20 H16 O2

Formula weight 288.33

Temperature 223(2) K

Wavelength 0.71073 Å

Crystal system Monoclinic

Space group P2(1)/c

Unit cell dimensions a = 9.4738(7) Å = 90°.

b = 13.377(1) Å = 104.107(1)°.

c = 12.2980(9) Å  = 90°.

Volume 1511.49(19) Å3

Z 4

Density (calculated) 1.267 Mg/m3

Absorption coefficient 0.081 mm-1

F(000) 608

Crystal size .2 x .2 x .35 mm3

Theta range for data collection 2.22 to 26.50°.

Index ranges -11<=h<=11, -16<=k<=16, -15<=l<=15

Reflections collected 12073

Independent reflections 3126 [R(int) = 0.0371]

Completeness to theta = 26.50° 99.9 %

Absorption correction None

Refinement method Full-matrix least-squares on F2

Data / restraints / parameters 3126 / 0 / 247

Goodness-of-fit on F2 1.064

Final R indices [I>2sigma(I)] R1 = 0.0625, wR2 = 0.1176

R indices (all data) R1 = 0.0874, wR2 = 0.1258

Largest diff. peak and hole 0.206 and -0.352 e.Å-3

Table 2. Atomic coordinates ( x 104) and equivalent isotropic displacement parameters (Å2x 103)

for jc002m. U(eq) is defined as one third of the trace of the orthogonalized Uij tensor.

________________________________________________________________________________

x y z U(eq)

________________________________________________________________________________

O(1) 896(1) 410(1) 1376(1) 41(1)

C(1) 1914(2) 157(1) 927(1) 32(1)

O(2) 1714(2) -167(1) -62(1) 45(1)

C(2) 3462(2) 215(1) 1596(1) 30(1)

C(3) 4421(2) 857(1) 1225(1) 32(1)

C(4) 5904(2) 785(2) 1719(2) 38(1)

C(5) 6453(2) 110(2) 2574(2) 40(1)

C(6) 5469(2) -457(2) 2990(2) 39(1)

C(7) 3974(2) -427(1) 2515(1) 33(1)

C(8) 8072(2) -33(2) 3019(2) 59(1)

C(11) 2992(2) -1079(1) 2986(2) 35(1)

C(12) 1955(2) -1701(2) 2322(2) 45(1)

C(13) 1052(2) -2285(2) 2802(2) 55(1)

C(14) 1189(3) -2266(2) 3935(2) 57(1)

C(15) 2234(3) -1676(2) 4603(2) 59(1)

C(16) 3117(3) -1083(2) 4132(2) 49(1)

C(21) 3864(2) 1640(1) 364(1) 33(1)

C(22) 4529(2) 1809(2) -508(2) 44(1)

C(23) 4018(3) 2557(2) -1291(2) 53(1)

C(24) 2856(3) 3135(2) -1213(2) 52(1)

C(25) 2187(2) 2983(2) -352(2) 46(1)

C(26) 2693(2) 2243(1) 440(2) 38(1)

________________________________________________________________________________

Table 3. Bond lengths [Å] and angles [°] for jc002m.

_____________________________________________________

O(1)-C(1) 1.269(2)

O(1)-H(1A) 1.23(2)

C(1)-O(2) 1.261(2)

C(1)-C(2) 1.499(2)

C(2)-C(3) 1.404(2)

C(2)-C(7) 1.407(2)

C(3)-C(4) 1.392(3)

C(3)-C(21) 1.492(2)

C(4)-C(5) 1.388(3)

C(4)-H(4A) 0.99(2)

C(5)-C(6) 1.393(3)

C(5)-C(8) 1.510(3)

C(6)-C(7) 1.395(3)

C(6)-H(6A) 0.98(2)

C(7)-C(11) 1.492(3)

C(8)-H(8C) 0.93(3)

C(8)-H(8B) 0.93(3)

C(8)-H(8A) 0.97(3)

C(11)-C(16) 1.385(3)

C(11)-C(12) 1.390(3)

C(12)-C(13) 1.391(3)

C(12)-H(12A) 0.95(2)

C(13)-C(14) 1.368(4)

C(13)-H(13A) 0.93(3)

C(14)-C(15) 1.372(4)

C(14)-H(14A) 0.92(3)

C(15)-C(16) 1.380(3)

C(15)-H(15A) 0.98(3)

C(16)-H(16A) 0.95(2)

C(21)-C(22) 1.388(3)

C(21)-C(26) 1.393(3)

C(22)-C(23) 1.391(3)

C(22)-H(22A) 0.96(2)

C(23)-C(24) 1.368(3)

C(23)-H(23A) 0.96(2)

C(24)-C(25) 1.375(3)

C(24)-H(24A) 0.94(2)

C(25)-C(26) 1.389(3)

C(25)-H(25A) 0.97(2)

C(26)-H(26A) 0.97(2)

C(1)-O(1)-H(1A) 110.3(9)

O(2)-C(1)-O(1) 124.04(16)

O(2)-C(1)-C(2) 116.40(16)

O(1)-C(1)-C(2) 119.55(15)

C(3)-C(2)-C(7) 120.66(16)

C(3)-C(2)-C(1) 118.51(15)

C(7)-C(2)-C(1) 120.58(16)

C(4)-C(3)-C(2) 118.70(16)

C(4)-C(3)-C(21) 120.19(17)

C(2)-C(3)-C(21) 121.03(16)

C(5)-C(4)-C(3) 121.86(18)

C(5)-C(4)-H(4A) 119.4(12)

C(3)-C(4)-H(4A) 118.8(12)

C(4)-C(5)-C(6) 118.18(17)

C(4)-C(5)-C(8) 121.13(19)

C(6)-C(5)-C(8) 120.66(19)

C(5)-C(6)-C(7) 122.14(18)

C(5)-C(6)-H(6A) 119.1(12)

C(7)-C(6)-H(6A) 118.6(12)

C(6)-C(7)-C(2) 118.08(17)

C(6)-C(7)-C(11) 119.05(16)

C(2)-C(7)-C(11) 122.87(16)

C(5)-C(8)-H(8C) 112.6(19)

C(5)-C(8)-H(8B) 112.0(19)

H(8C)-C(8)-H(8B) 112(3)

C(5)-C(8)-H(8A) 108.8(18)

H(8C)-C(8)-H(8A) 103(2)

H(8B)-C(8)-H(8A) 108(3)

C(16)-C(11)-C(12) 117.93(19)

C(16)-C(11)-C(7) 119.33(17)

C(12)-C(11)-C(7) 122.74(17)

C(11)-C(12)-C(13) 120.5(2)

C(11)-C(12)-H(12A) 117.3(14)

C(13)-C(12)-H(12A) 122.2(14)

C(14)-C(13)-C(12) 120.4(2)

C(14)-C(13)-H(13A) 122.5(15)

C(12)-C(13)-H(13A) 117.1(15)

C(13)-C(14)-C(15) 119.8(2)

C(13)-C(14)-H(14A) 121.7(16)

C(15)-C(14)-H(14A) 118.6(16)

C(14)-C(15)-C(16) 120.1(2)

C(14)-C(15)-H(15A) 119.3(15)

C(16)-C(15)-H(15A) 120.6(15)

C(15)-C(16)-C(11) 121.3(2)

C(15)-C(16)-H(16A) 118.1(14)

C(11)-C(16)-H(16A) 120.7(14)

C(22)-C(21)-C(26) 118.47(18)

C(22)-C(21)-C(3) 120.94(18)

C(26)-C(21)-C(3) 120.56(16)

C(21)-C(22)-C(23) 120.3(2)

C(21)-C(22)-H(22A) 120.7(13)

C(23)-C(22)-H(22A) 119.0(13)

C(24)-C(23)-C(22) 120.6(2)

C(24)-C(23)-H(23A) 121.2(15)

C(22)-C(23)-H(23A) 118.2(15)

C(23)-C(24)-C(25) 120.0(2)

C(23)-C(24)-H(24A) 120.1(15)

C(25)-C(24)-H(24A) 119.9(15)

C(24)-C(25)-C(26) 120.0(2)

C(24)-C(25)-H(25A) 120.8(14)

C(26)-C(25)-H(25A) 119.2(14)

C(25)-C(26)-C(21) 120.63(19)

C(25)-C(26)-H(26A) 119.3(13)

C(21)-C(26)-H(26A) 120.0(12)

_____________________________________________________________

Symmetry transformations used to generate equivalent atoms:

1. P. Rajamkumar and V. Murali, *Synth. Commun*. 1995, **25**, 3537. [↑](#endnote-ref-2)
2. Based on literature procedures. D. L. Tuleen and B. A. Hess, Jr., *J. Chem. Educ.* 1971, **48**,476. [↑](#endnote-ref-3)
3. Based on literature procedures. T. M. Brown, W. Carruthers and M. G. Pellat, *J. Chem. Soc., Perkin Trans.1*, 1982, 483. [↑](#endnote-ref-4)
